# Supplementary material for: N,N′-Di-carboxymethyl perylene diimide functionalized magnetic nanocomposites with enhanced peroxidase-like activity for colorimetric sensing of H2O2and glucose
Source: Royal Society of Chemistry journal article supplement (doi:10.1039/c7nj00292k), 2017-01-01
Supplement: c7nj00292k1.pdf [file c7nj00292k1.pdf]

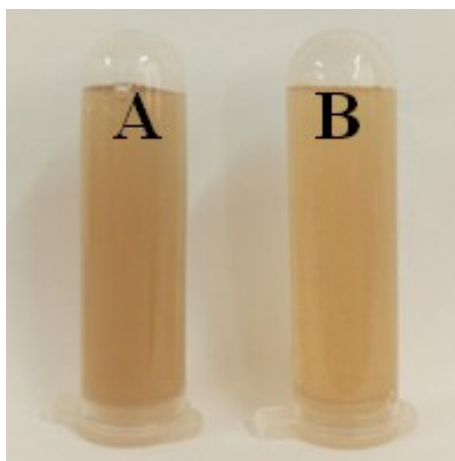

Fig. S1. The stability of PDI-Fe<sub>3</sub>O<sub>4</sub> dispersed in water: fresh sample (A) and sample of standing after 12 d (B), respectively.

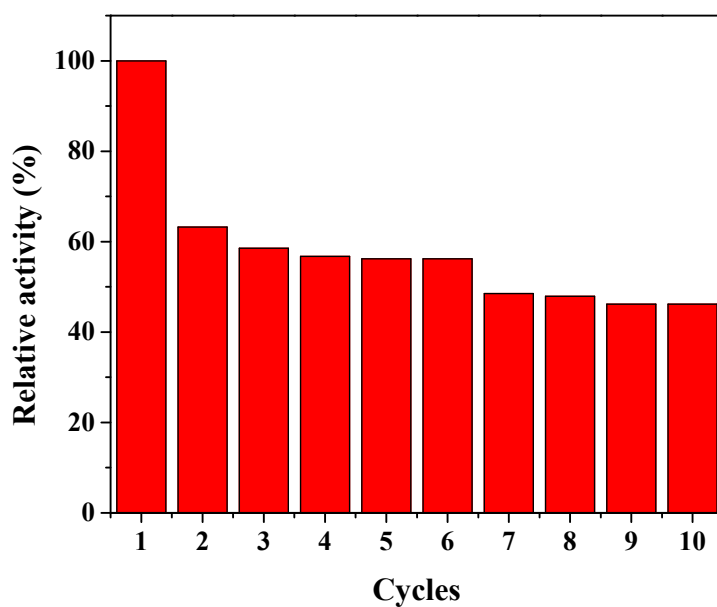

Fig. S2. The catalytic activity of the PDI-Fe<sub>3</sub>O<sub>4</sub> nanocomposites in ten successive recycling catalytic experiments. (the conversion of the catalytic activity with the first run as 100 %).
